# Supplementary material for: Toxic Metals in a Paddy Field System: A Review
Source: MDPI journal article supplement (doi:10.3390/toxics10050249), 2022-05-16
Supplement: s1 [file s1]

# Supplementary Materials: Toxic Metals in a Paddy Field System: A Review

Yuanliang Duan, Qiang Li, Lu Zhang, Zhipeng Huang, Zhongmeng Zhao, Han Zhao, Jun Du and Jian Zhou

**Table S1.** Effects of toxic metals on the apparent indexes and body composition of rice (Promote/Increase)

| Organization/Substance/<br>Parameters           | Influence of toxic metals                                              |                                                                                              | Toxic metal species                                                                                                                                                                                                                                   | References          |
|-------------------------------------------------|------------------------------------------------------------------------|----------------------------------------------------------------------------------------------|-------------------------------------------------------------------------------------------------------------------------------------------------------------------------------------------------------------------------------------------------------|---------------------|
|                                                 | Concentrations (ppm)                                                   | Degree                                                                                       |                                                                                                                                                                                                                                                       |                     |
| Germination percentage, shoot/root length, etc. | Sb [III, 0–50]; La [0–6.946]                                           | Shoot length (~18.7%); root length increase                                                  | La(NO <sub>3</sub> ) <sub>3</sub>                                                                                                                                                                                                                     | [36,38]             |
| Transformation ratio of dry matter              | Sb [V, 5–50]                                                           | The transformation ratio of dry matter exhibited a slight increase                           | na                                                                                                                                                                                                                                                    | [38]                |
| $\alpha$ -amylase activity                      | Sb (V) [5–50]                                                          | Sb (V) can increase the activity of $\alpha$ -amylase                                        | na                                                                                                                                                                                                                                                    | [23,38]             |
| Plant height                                    | Cd [0–0.0112]; La [0–30]                                               | Plant height increased slightly                                                              | CdCl <sub>2</sub> ; LaCl <sub>3</sub>                                                                                                                                                                                                                 | [34]                |
| Tillering ability                               | As [0–1]                                                               | This effect reached a significant level (~12.60%)                                            | Na <sub>2</sub> HAsO <sub>4</sub> ·7H <sub>2</sub> O                                                                                                                                                                                                  | [39]                |
| Thousand-grain weight                           | na                                                                     | na                                                                                           | na                                                                                                                                                                                                                                                    | na                  |
| Biomass accumulation                            | Cu [0.00065–0.065]                                                     | The biomass of rice increased significantly at low (<0.065 mg L <sup>-1</sup> ) Cu (~30.99%) | CuSO <sub>4</sub>                                                                                                                                                                                                                                     | [40]                |
| Net photosynthesis and photosynthetic capacity  | As [0–0.2]                                                             | Net photosynthesis (Pn) and photosynthetic capacity were increased slightly                  | Dimethylarsenic acid (DMAA)                                                                                                                                                                                                                           | [41]                |
| Photosynthetic pigments                         | na                                                                     | na                                                                                           | na                                                                                                                                                                                                                                                    | na                  |
| Gibberellin                                     | na                                                                     | na                                                                                           | na                                                                                                                                                                                                                                                    | na                  |
| Absciscic acid                                  | Pb [1000]                                                              | Absciscic acid was significantly increased                                                   | Pb(NO <sub>3</sub> ) <sub>2</sub>                                                                                                                                                                                                                     | [42]                |
| MDA                                             | Pb [2.072–1200], Hg [2.006], Cd [0–100], Zn [200], La [69.455–208.365] | Cd treatment had a substantial influence in MDA (~177.99%)                                   | PbCl <sub>2</sub> , Pb(NO <sub>3</sub> ) <sub>2</sub> , HgCl <sub>2</sub> , CdCl <sub>2</sub> , CdCl <sub>2</sub> ·5H <sub>2</sub> O, CdCl <sub>2</sub> ·2.5H <sub>2</sub> O, ZnSO <sub>4</sub> ·7H <sub>2</sub> O, La(NO <sub>3</sub> ) <sub>3</sub> | [23,27,37,43–46]    |
| POD                                             | La [0–900], Pb [400–1200], Cd [50], Zn [200], La [0–13.891]            | Significant changes were observed in POD (~104.89%)                                          | LaCl <sub>3</sub> , Pb(NO <sub>3</sub> ) <sub>2</sub> , CdCl <sub>2</sub> ·5H <sub>2</sub> O, ZnSO <sub>4</sub> ·7H <sub>2</sub> O, La(NO <sub>3</sub> ) <sub>3</sub>                                                                                 | [34,37,44,45]       |
| SOD                                             | Pb [400–1200]; Cd [150]                                                | Significant changes were observed in SOD (~230.13%)                                          | Pb(NO <sub>3</sub> ) <sub>2</sub> , CdCl <sub>2</sub> ·2.5H <sub>2</sub> O                                                                                                                                                                            | [44,47]             |
| CAT                                             | Pb [2.072–1200], Cd [50–150], Zn [200], La [0–13.891]                  | Significant changes were observed in CAT (~86.49%)                                           | PbCl <sub>2</sub> , Pb(NO <sub>3</sub> ) <sub>2</sub> , CdCl <sub>2</sub> ·2.5H <sub>2</sub> O, CdCl <sub>2</sub> ·5H <sub>2</sub> O, ZnSO <sub>4</sub> ·7H <sub>2</sub> O, La(NO <sub>3</sub> ) <sub>3</sub>                                         | [37,43–45,47]       |
| H <sub>2</sub> O <sub>2</sub>                   | Pb [400–1200], Cd [50–150], Hg [2.006], La [69.455–208.365]            | The content of H <sub>2</sub> O <sub>2</sub> increased significantly (~156.01%)              | Pb(NO <sub>3</sub> ) <sub>2</sub> , CdCl <sub>2</sub> ·2.5H <sub>2</sub> O, HgCl <sub>2</sub> , La(NO <sub>3</sub> ) <sub>3</sub>                                                                                                                     | [27,37,43,44,46,47] |
| Others                                          | La [0–900], Pb [2.072–1200], Hg [2.006], Cd [50–100], Zn [200]         | Deterioration of membranes, membrane permeability increase, leakage of electrolytes, etc.    | LaCl <sub>3</sub> , PbCl <sub>2</sub> , Pb(NO <sub>3</sub> ) <sub>2</sub> , HgCl <sub>2</sub> , CdCl <sub>2</sub> ·5H <sub>2</sub> O, CdCl <sub>2</sub> ·2.5H <sub>2</sub> O, ZnSO <sub>4</sub> ·7H <sub>2</sub> O                                    | [27,34,43–46]       |

Note: The Sb, MDA, POD, SOD and CAT represent antimony, malondialdehyde, peroxidase, superoxide dismutase and catalase, respectively. The “na” represents nothing or not clear. For the convenience of comparison and analysis, the units are unified as ppm.

**Table S2.** Effects of toxic metals on the apparent indexes and body composition of rice (Inhibit/Reduce).

| Organization/Substance/<br>Parameters           | Influence of toxic metals                                                                                                                                                                   |                                                                                                                                                                                  | Toxic metal species                                                                                                                                                                                                                                                                                                                                              | References                               |
|-------------------------------------------------|---------------------------------------------------------------------------------------------------------------------------------------------------------------------------------------------|----------------------------------------------------------------------------------------------------------------------------------------------------------------------------------|------------------------------------------------------------------------------------------------------------------------------------------------------------------------------------------------------------------------------------------------------------------------------------------------------------------------------------------------------------------|------------------------------------------|
|                                                 | Concentrations (ppm)                                                                                                                                                                        | Degree                                                                                                                                                                           |                                                                                                                                                                                                                                                                                                                                                                  |                                          |
| Germination percentage, shoot/root length, etc. | Sb [III, 0.001–1], Sb [V, 0.001–1], Pb [2.072–1000], Hg [2.006–20.06], Cd [0.1124 – 28.10], Cu [12.70 – 127.00], Zn [16.35], Ni [0–1000], La [138.91–208.365], As [V, 0–20], As [III, 0–20] | Germinating seeds was greatly inhibited, even no root and shoot formation was observed in a high concentration.                                                                  | PbCl <sub>2</sub> , Pb(NO <sub>3</sub> ) <sub>2</sub> , HgCl <sub>2</sub> , CdCl <sub>2</sub> , Cd(NO <sub>3</sub> ) <sub>2</sub> , CuSO <sub>4</sub> , ZnSO <sub>4</sub> , NiCl <sub>2</sub> , La(NO <sub>3</sub> ) <sub>3</sub> , Na <sub>2</sub> HAsO <sub>4</sub> ·7H <sub>2</sub> O, As <sub>2</sub> O <sub>3</sub>                                         | [21,22,24,26,29,30,31,33,36,38,42,48,49] |
| Transformation ratio of dry matter              | Sb [III, 0.001–1], Sb [V, 0.2–1]                                                                                                                                                            | The transformation ratio of dry matter gradually decreased from 25.7% to 46.05%                                                                                                  | na                                                                                                                                                                                                                                                                                                                                                               | [38]                                     |
| α-amylase activity                              | Sb [III, 0.001–1], Sb [V, 0.1–1], Pb [20.72–1000], Hg [2.006], Cd [0.1124 – 22.48], Cu [12.70–127.00]                                                                                       | α-amylase activity in germinating seeds is significantly decreased (~85.2%)                                                                                                      | PbCl <sub>2</sub> , Pb(NO <sub>3</sub> ) <sub>2</sub> , HgCl <sub>2</sub> , CdCl <sub>2</sub> , CuSO <sub>4</sub>                                                                                                                                                                                                                                                | [24,26,29,31,38,42]                      |
| Plant height                                    | La [150–900], Pb [0–248.64], Cd [0.1124–35], As [0–8]                                                                                                                                       | Plant height decreased significantly with increasing toxic metals concentrations (~49%)                                                                                          | LaCl <sub>3</sub> , Pb(NO <sub>3</sub> ) <sub>2</sub> , CdCl <sub>2</sub> , CdSO <sub>4</sub> ·8/3H <sub>2</sub> O, Na <sub>2</sub> HAsO <sub>4</sub> ·7H <sub>2</sub> O,                                                                                                                                                                                        | [23,25,34,39,50,51]                      |
| Tillering ability                               | Pb [0–1200], Cd [30–150], As [2–8]                                                                                                                                                          | Tillers occurred slowly and tiller number decreased significantly (~55%)                                                                                                         | Pb (NO <sub>3</sub> ) <sub>2</sub> , CdCl <sub>2</sub> ·2.5H <sub>2</sub> O, Na <sub>2</sub> HAsO <sub>4</sub> ·7H <sub>2</sub> O                                                                                                                                                                                                                                | [25,27,39,44,47,50]                      |
| Thousand-grain weight                           | Pb [400–1200], Cd [30], As [0–8]                                                                                                                                                            | Toxic metals significantly reduced 1000-grain weight of rice (~17.94%)                                                                                                           | Pb(NO <sub>3</sub> ) <sub>2</sub> , Na <sub>2</sub> HAsO <sub>4</sub> ·7H <sub>2</sub> O                                                                                                                                                                                                                                                                         | [27,39,44,50]                            |
| Biomass accumulation                            | Pb [0–248.64], Hg [2.006–20.06], Cd [150], Cu [0.065–6.5], As [0–8]                                                                                                                         | The biomass of rice decreased significantly (~62%), and the reduction in dry weight observed in shoot, root, and leaf                                                            | PbCl <sub>2</sub> , Pb(NO <sub>3</sub> ) <sub>2</sub> , HgCl <sub>2</sub> , CdCl <sub>2</sub> ·2.5H <sub>2</sub> O, CuSO <sub>4</sub> , Na <sub>2</sub> HAsO <sub>4</sub> ·7H <sub>2</sub> O, Dimethylarsenic acid                                                                                                                                               | [21,22,25,39,40,41,47]                   |
| Net photosynthesis and photosynthetic capacity  | Cd [1.124–150], Ni [5.87–29.35], As [0.8–1.6]                                                                                                                                               | Net photosynthesis and photosynthetic capacity were decreased significantly                                                                                                      | CdCl <sub>2</sub> , CdCl <sub>2</sub> ·2.5H <sub>2</sub> O, CdSO <sub>4</sub> ·8/3H <sub>2</sub> O, NiCl <sub>2</sub> , Dimethylarsenic acid                                                                                                                                                                                                                     | [41,47,51,52]                            |
| Photosynthetic pigments                         | Pb [400–1200], Cd [0.1124–100], Zn [200], Ni [0–1000], As [V, 0–20], As [III, 0–20]                                                                                                         | Pb stress inhibited photosynthetic pigments significantly, i.e., Chl a (~79.65%), Chl b (~85.21%), total Chlorophyll contents (Chl a + Chl b) (~80.98) and carotenoids (~87.76%) | Pb(NO <sub>3</sub> ) <sub>2</sub> , CdCl <sub>2</sub> , CdCl <sub>2</sub> ·5H <sub>2</sub> O, CdCl <sub>2</sub> ·2.5H <sub>2</sub> O, CdSO <sub>4</sub> ·8/3H <sub>2</sub> O, Cd(NO <sub>3</sub> ) <sub>2</sub> , ZnSO <sub>4</sub> ·7H <sub>2</sub> O, NiCl <sub>2</sub> , Na <sub>2</sub> HAsO <sub>4</sub> ·7H <sub>2</sub> O, As <sub>2</sub> O <sub>3</sub> | [23,27,30,33,44–46,49,51]                |
| Gibberellin                                     | Pb [1000]                                                                                                                                                                                   | lead promotes GA inactivation and inhibited GA signal transduction in rice seeds                                                                                                 | Pb(NO <sub>3</sub> ) <sub>2</sub>                                                                                                                                                                                                                                                                                                                                | [42]                                     |
| Absciscic acid                                  | na                                                                                                                                                                                          | na                                                                                                                                                                               | na                                                                                                                                                                                                                                                                                                                                                               | na                                       |
| MDA                                             | na                                                                                                                                                                                          | na                                                                                                                                                                               | na                                                                                                                                                                                                                                                                                                                                                               | na                                       |
| POD                                             | Cd [50–100]                                                                                                                                                                                 | POD activity showed a decreasing trend (~14.88%)                                                                                                                                 | CdCl <sub>2</sub> ·2.5H <sub>2</sub> O                                                                                                                                                                                                                                                                                                                           | [46]                                     |
| SOD                                             | Pb [2.072], Hg [2.006], Cd [0.01124–100], Zn [200]                                                                                                                                          | SOD activities were decreased significantly (~51.29%)                                                                                                                            | PbCl <sub>2</sub> , HgCl <sub>2</sub> , CdCl <sub>2</sub> , CdCl <sub>2</sub> ·2.5H <sub>2</sub> O, CdCl <sub>2</sub> ·5H <sub>2</sub> O, ZnSO <sub>4</sub> ·7H <sub>2</sub> O                                                                                                                                                                                   | [23,43,45,46]                            |
| CAT                                             | Hg [2.006], Cd [0.01124–100]                                                                                                                                                                | CAT activity showed a decreasing trend (~38.93%)                                                                                                                                 | HgCl <sub>2</sub> , CdCl <sub>2</sub> , CdCl <sub>2</sub> ·2.5H <sub>2</sub> O                                                                                                                                                                                                                                                                                   | [23,43,46]                               |
| H <sub>2</sub> O <sub>2</sub>                   | Pb [2.072]                                                                                                                                                                                  | H <sub>2</sub> O <sub>2</sub> content showed a decreasing trend (~27.50%)                                                                                                        | PbCl <sub>2</sub>                                                                                                                                                                                                                                                                                                                                                | [43]                                     |

|        |            |                                                                    |                   |      |
|--------|------------|--------------------------------------------------------------------|-------------------|------|
| Others | Ni[0–1000] | Nickel greatly reduced the concentrations of Na, K, and Ca in rice | NiCl <sub>2</sub> | [33] |
|--------|------------|--------------------------------------------------------------------|-------------------|------|

Note: The Sb, MDA, POD, SOD and CAT represent antimony, malondialdehyde, peroxidase, superoxide dismutase and catalase, respectively. The “na” represents nothing or not clear. For the convenience of comparison and analysis, the units are unified as ppm.
